# Supplementary figures and images for: Measuring Overtourism: A Necessary Tool for Landscape Planning
Source: MDPI journal article supplement (doi:10.3390/land10090889), 2021-08-25

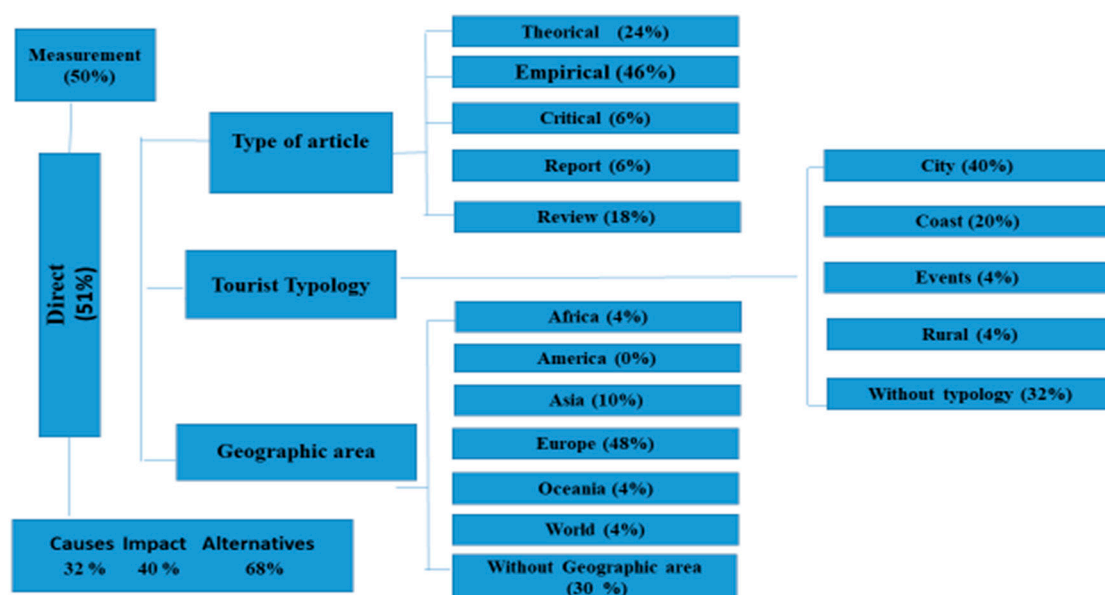

Figure S1. Features of the sample of papers on overtourism

Supplement: s1 [file s1]
